# Supplementary material for: Sequence Analysis and Comparative Study of the Protein Subunits of Archaeal RNase P
Source: MDPI journal article supplement (doi:10.3390/biom6020022), 2016-04-20
Supplement: s1 [file s1]

# Supplementary Materials: Sequence Analysis and Comparative Study of the Protein Subunits of Archaeal RNase P

Manoj P. Samanta, Stella M. Lai, Charles J. Daniels and Venkat Gopalan

## Materials and Methods

### 1. Online databases

Archaeal genomes were downloaded from the NCBI database (<ftp://ftp.ncbi.nlm.nih.gov/genomes/>). Web-based tools provided by the JGI (Joint Genome Institute) IMG (Integrated Microbial Genomes) database (<http://img.jgi.doe.gov>) were used for genome analysis.

### 2. Identification of archaeal RPPs

We first compiled a reduced list of genomes that drew from the entire set of 678 genomes downloaded from the NCBI database. Genomes without genus or species assignments (e.g., *Crenarchaeote* SCGC AAA261-C22) were removed, and only one genome per genus was kept (with preference given to fully assembled genomes wherever possible). This process yielded a reduced set of 127 genomes (highlighted in yellow in Table S1B). BLAST searches (tblastn, cutoff 1e-5) for all five RPPs were conducted against this reduced set of genomes. Previously annotated proteins from the Uniprot database (<http://www.uniprot.org/>) as well as those identified in the IMG database based on COG, Pfam, and KO domain pattern matches were also used in our final compilation.

### 3. Alignment of RPPs

To generate sequence alignments for each of the four RPPs, web-based tools from the IMG database were used to obtain a shortlist of sequences. Genomes from the IMG database were queried for the presence of RPP21, RPP29, POP5, and RPP30 using the COGs, Pfams, and KOs for each protein (see below). Duplicates were removed using the IMG command “drop=d”. Overrepresentation of closely related sequences was addressed by sequential use of the USEARCH algorithms cluster\_fast and uclust, with the limit of relatedness set to < 80% identity.

| Protein | COG     | Pfam      | KO     |
|---------|---------|-----------|--------|
| POP5    | COG1369 | pfam01900 | K03537 |
| RPP21   | COG2023 | pfam04032 | K03540 |
| RPP29   | COG1588 | pfam01868 | K03538 |
| RPP30   | COG1603 | pfam01876 | K03539 |

A total of 69 genomes met these stringent requirements. Two additional genomes, *Pyrococcus horikoshii* and *Bathyarchaeota archaeon* BAI, were manually added to comprise the final set (Table S3). RPP sequences were then aligned using the MUSCLE program (<http://www.drive5.com/muscle/>) [1] and graphically represented using the web-based Berkeley WebLogo application (<http://weblogo.berkeley.edu/logo.cgi>) [2].

To depict the highly conserved residues in the high-resolution structures of *Pyrococcus furiosus* RPP21•RPP29 and *Pyrococcus horikoshii* POP5•RPP30, the relative frequency of every amino acid at each position in the protein sequence was calculated. For example, if there were 60 arginines found at a particular position out of 71 sequences, an 84.5% sequence identity for arginine was noted.

### 4. Putative Ancestral Loci of RPP Genes

The 127 non-redundant “reduced set” of genomes was used to find genomic loci containing RPP genes, which were then compared to find the longest common contiguous locus supported by at least two phyla. We defined a locus as a contiguous set of genes with the same transcriptional polarity.

For RPP29, *Methanothermobacter marburgensis* (strain DSM 2133) from Euryarchaeota and *Desulfurococcus fermentans* Z-1312 (strain DSM 16532) from Crenarchaeota provide support for the longest

common contiguous locus, as shown in Figure 1A. The inclusion of eIF is supported by *Methanothermus fervidus* V24S (strain DSM 2088) from Euryarchaeota and *Nanoarchaeota archaeon* SCGC AAA011-L22 from Nanoarchaeota.

For POP5 and RPP30, *Methanothermobacter marburgensis* (strain DSM 2133) from Euryarchaeota and *Thermogladius cellulolyticus* (strain 1633) from Crenarchaeota provide support for the longest common contiguous locus, as shown in Figure 1B.

For RPP21, *Methanothermus fervidus* V24S (strain DSM 2088) from Euryarchaeota and *Desulfurococcus fermentans* Z-1312 (strain DSM 16532) from Crenarchaeota provide support for the longest common contiguous locus (not shown): rpp21, yhbY, S19e, TFAR19 protein, L39e, L31e, eIF6, L18a, pfdA, and ftsY.

**Table S1.** Archaeal genomes available from the NCBI database. (A) Distribution of RPPs in different archaeal phyla. (B) Complete list of archaeal genomes. Genomes highlighted in yellow are part of the reduced list of 127 genomes used for loci analysis.

(See MSamanta\_Supplementary\_Tables.xls)

**Table S2.** Tabulation of RPPs in each archaeal phylum. (A) Euryarchaeota (B) Crenarchaeota (C) Thaumarchaeota (D) Other archaeal phyla. Y, present; N, absent.

(See MSamanta\_Supplementary\_Tables.xls)

**Table S3.** List of 71 archaeal genomes whose RPPs were used in the sequence alignments.

(See MSamanta\_Supplementary\_Tables.xls)

**Table S4.** Conserved residues with identity scores.

| RPP21   |            | RPP29   |            | POP5    |            | RPP30   |            | L7Ae    |            |
|---------|------------|---------|------------|---------|------------|---------|------------|---------|------------|
| Residue | % Identity |
| A14     | 84         | H46     | 88         | L8      | 84         | V81     | 78         | Y7      | 87         |
| E16     | 80         | E47     | 87         | R13     | 88         | G84     | 76         | V8      | 87         |
| R17     | 92         | L48     | 83         | R17     | 95         | R90     | 97         | F10     | 83         |
| L21     | 100        | G50     | 98         | Y18     | 98         | V97     | 81         | P13     | 97         |
| A25     | 97         | L51     | 94         | G47     | 100        | D98     | 80         | A27     | 84         |
| Y39     | 90         | V55     | 81         | R71     | 84         | L100    | 78         | R28     | 81         |
| V40     | 90         | G65     | 83         | S103    | 90         | A120    | 76         | T30     | 84         |
| A43     | 84         | G68     | 100        | G104    | 97         | V125    | 80         | G31     | 91         |
| R51     | 80         | V70     | 80         | T105    | 90         | R142    | 84         | K35     | 98         |
| P55     | 81         | E73     | 100        |         |            | P162    | 80         | G36     | 100        |
| R60     | 81         | T74     | 92         |         |            | R176    | 76         | N38     | 100        |
| C63     | 100        | K91     | 100        |         |            | G189    | 77         | E39     | 100        |
| C66     | 100        | F96     | 88         |         |            |         |            | T41     | 100        |
| G73     | 92         | V106    | 84         |         |            |         |            | K42     | 100        |
| R79     | 98         | G110    | 100        |         |            |         |            | A43     | 80         |
| C92     | 100        | P117    | 94         |         |            |         |            | E45     | 100        |
| C95     | 100        | R120    | 98         |         |            |         |            | R46     | 97         |
| G96     | 92         |         |            |         |            |         |            | G47     | 85         |
| R100    | 91         |         |            |         |            |         |            | A49     | 88         |
| P102    | 80         |         |            |         |            |         |            | L51     | 98         |
|         |            |         |            |         |            |         |            | V52     | 84         |
|         |            |         |            |         |            |         |            | A55     | 83         |
|         |            |         |            |         |            |         |            | D57     | 98         |
|         |            |         |            |         |            |         |            | V58     | 87         |
|         |            |         |            |         |            |         |            | P60     | 100        |
|         |            |         |            |         |            |         |            | E62     | 100        |
|         |            |         |            |         |            |         |            | I63     | 88         |
|         |            |         |            |         |            |         |            | V64     | 88         |
|         |            |         |            |         |            |         |            | H66     | 100        |
|         |            |         |            |         |            |         |            | P68     | 92         |
|         |            |         |            |         |            |         |            | L70     | 88         |
|         |            |         |            |         |            |         |            | E73     | 98         |
|         |            |         |            |         |            |         |            | K74     | 97         |
|         |            |         |            |         |            |         |            | P77     | 87         |
|         |            |         |            |         |            |         |            | G88     | 100        |
|         |            |         |            |         |            |         |            | A90     | 97         |
|         |            |         |            |         |            |         |            | G92     | 97         |
|         |            |         |            |         |            |         |            | V95     | 100        |
|         |            |         |            |         |            |         |            | A98     | 85         |
|         |            |         |            |         |            |         |            | I102    | 88         |
|         |            |         |            |         |            |         |            | G106    | 95         |
|         |            |         |            |         |            |         |            | L122    | 90         |

Conserved residues in each of the five RPPs. The ones highlighted in red indicate conserved residues that were not included in our analysis due to their absence in the sequences of *Pfu* RPP21 or RPP29 or L7Ae or *Pho* POP5 or RPP30.

## A. RPP21

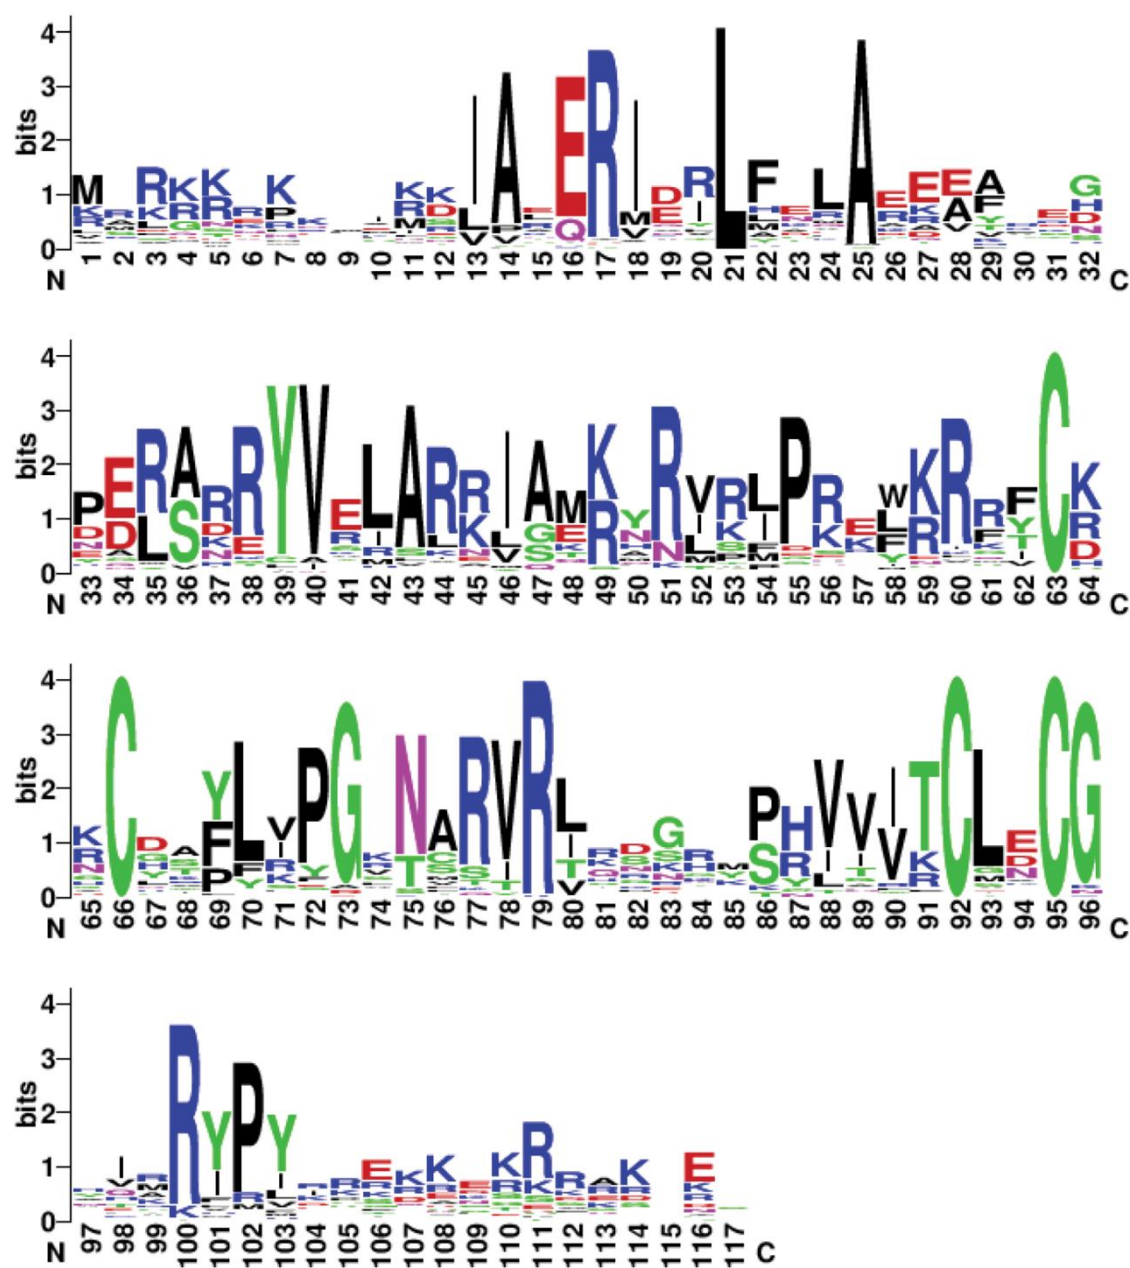

weblogo.berkeley.edu

Figure S1. Cont.

## B. RPP29

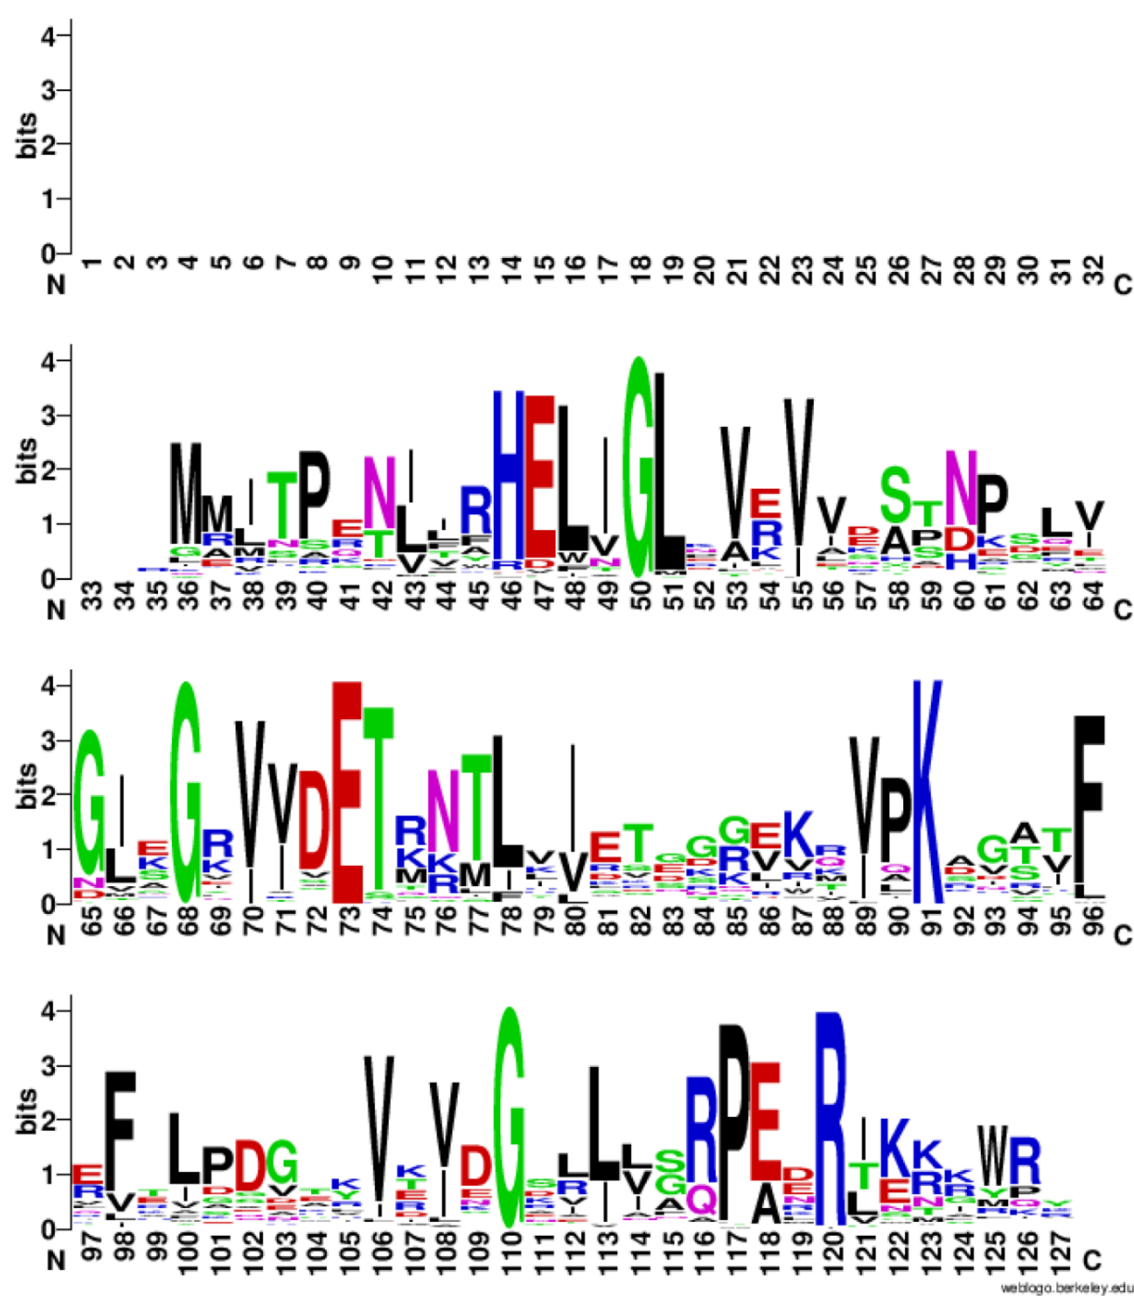

Figure S1. Cont.

## C. POP5

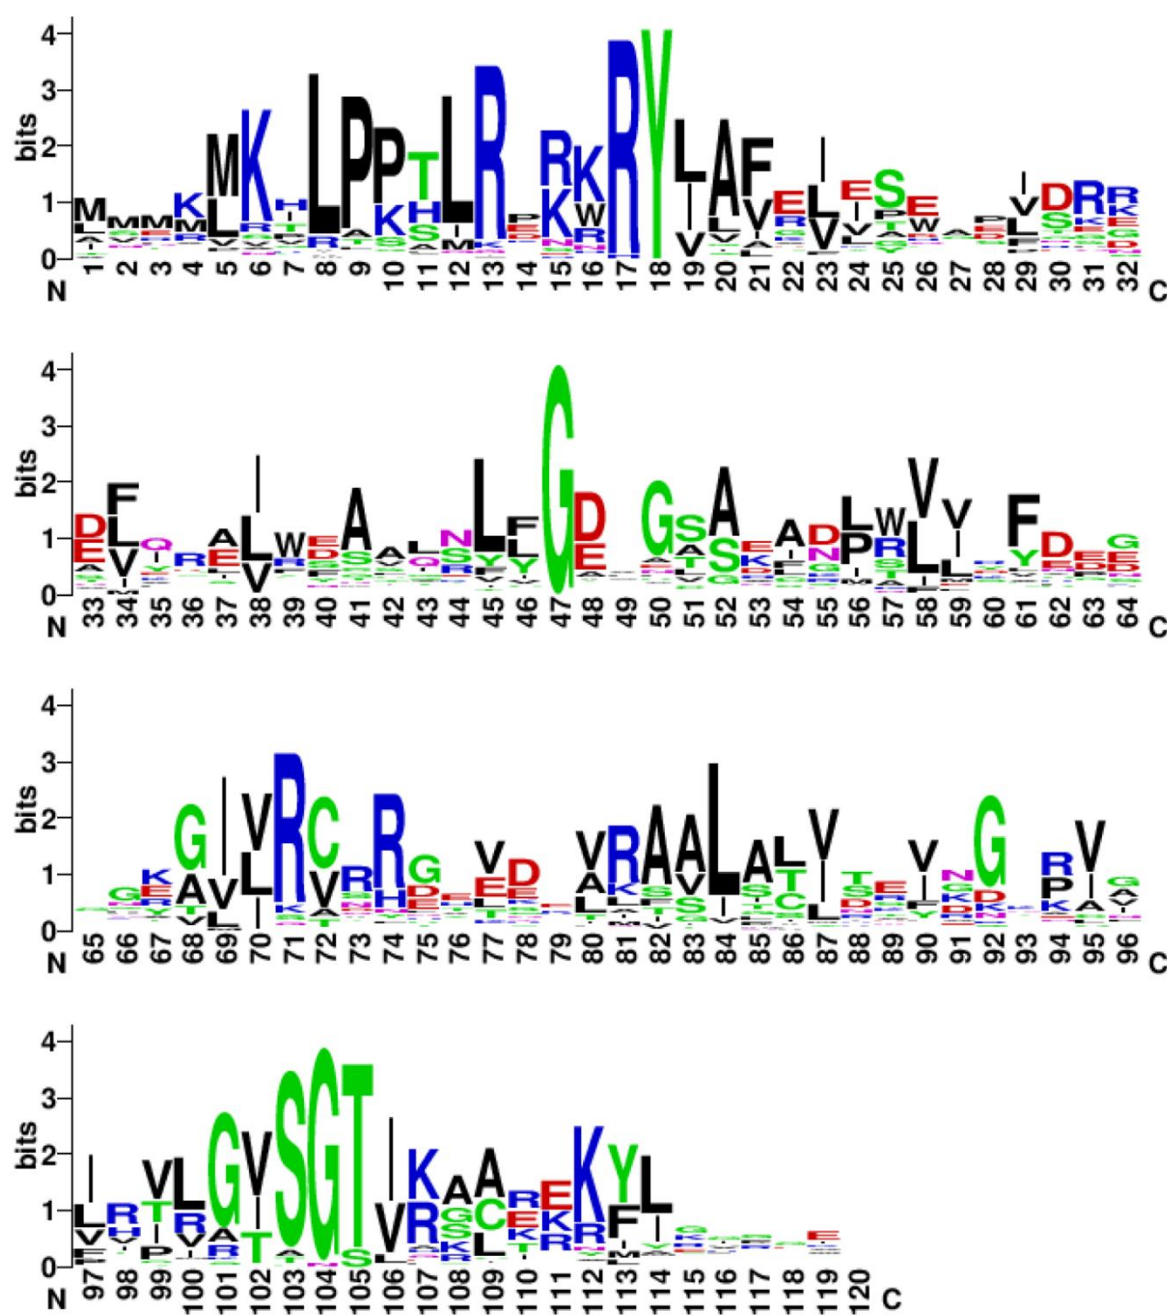

weblogo.berkeley.edu

Figure S1. Cont.

## D. RPP30

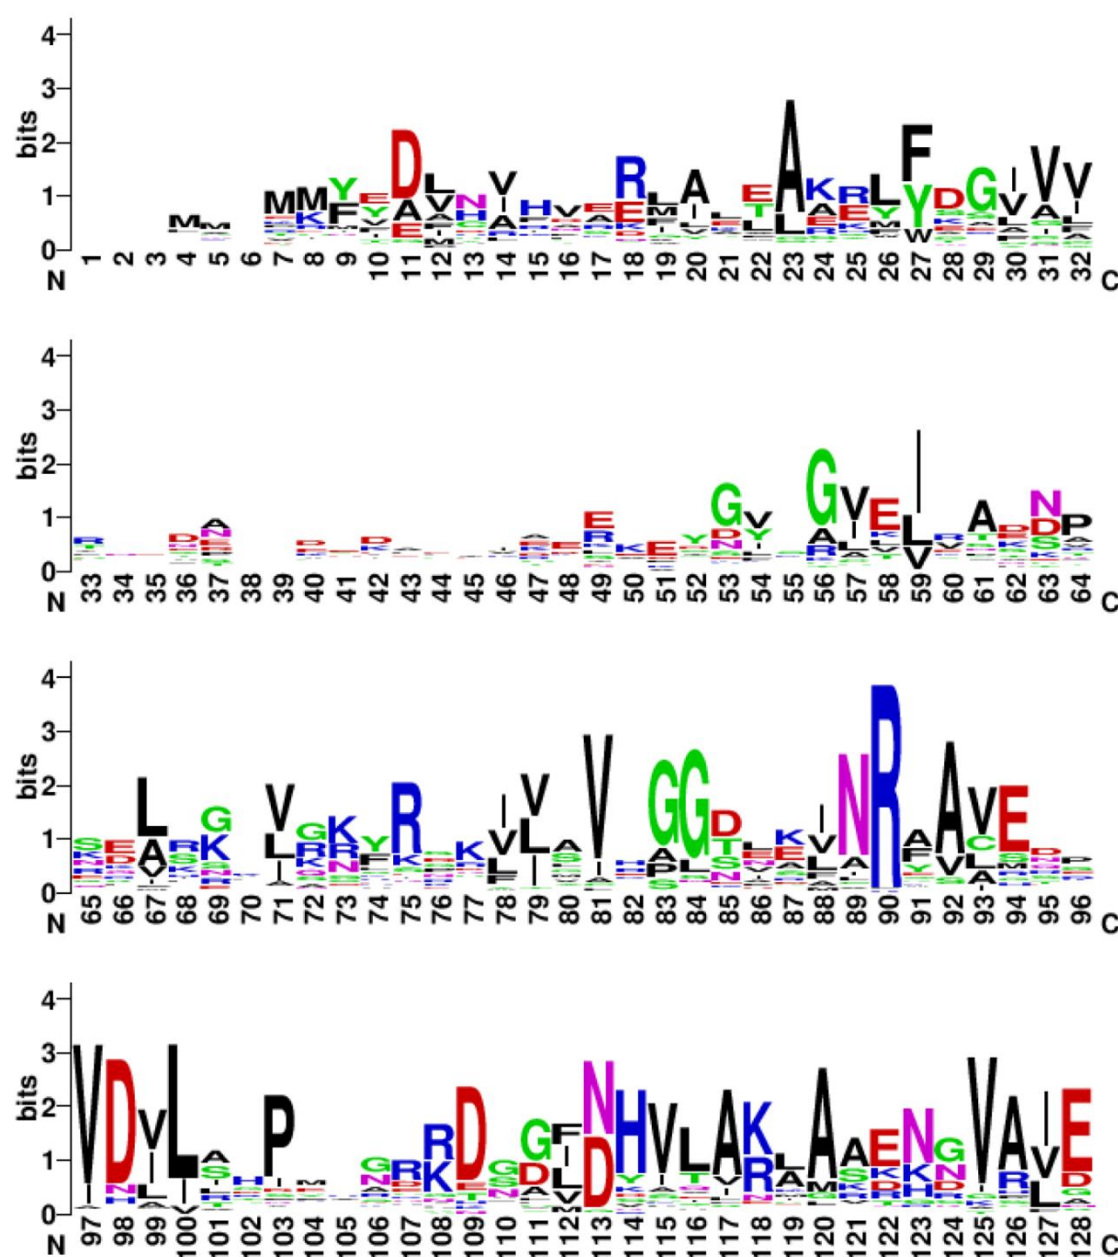

Figure S1. Cont.



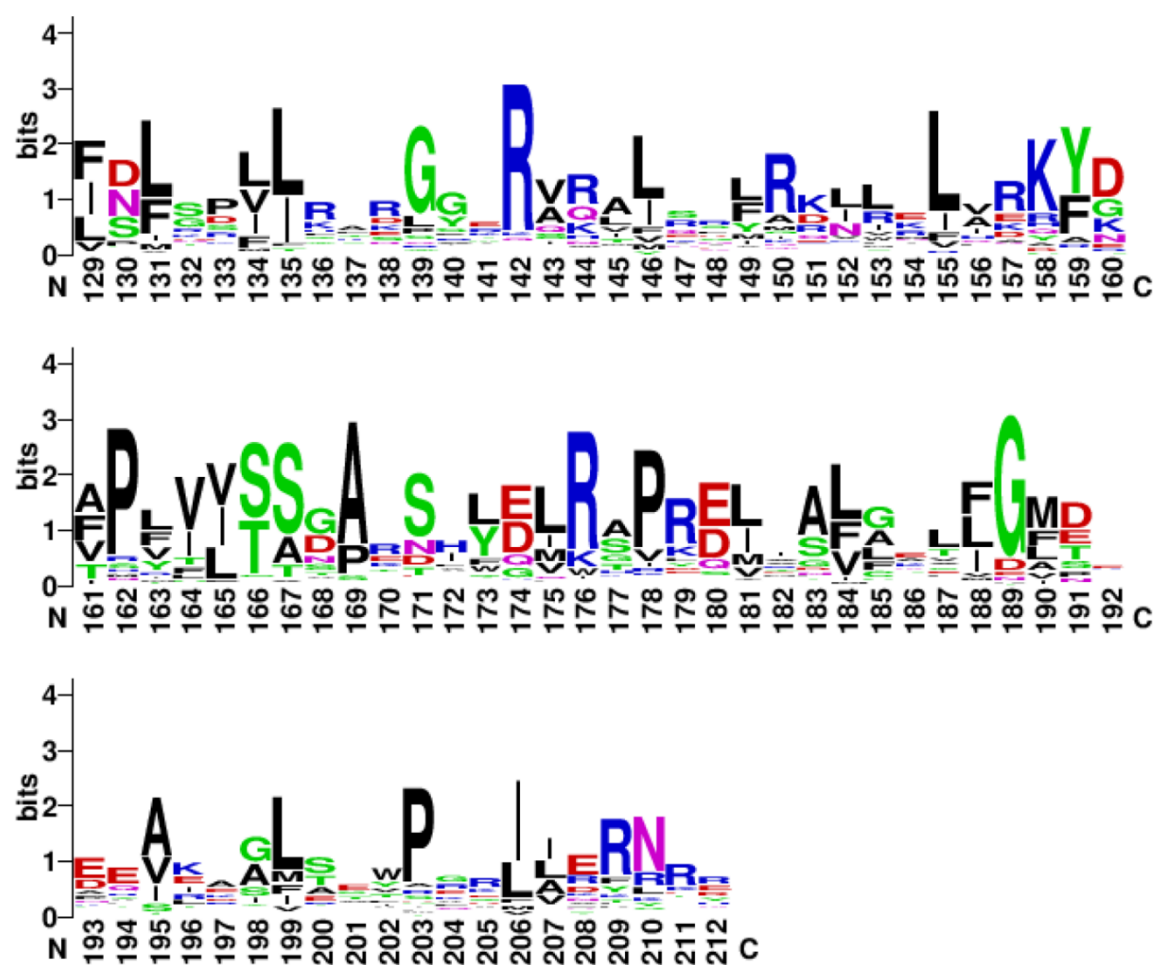

weblogo.berkeley.edu

Figure S1. Cont.

### E. L7Ae

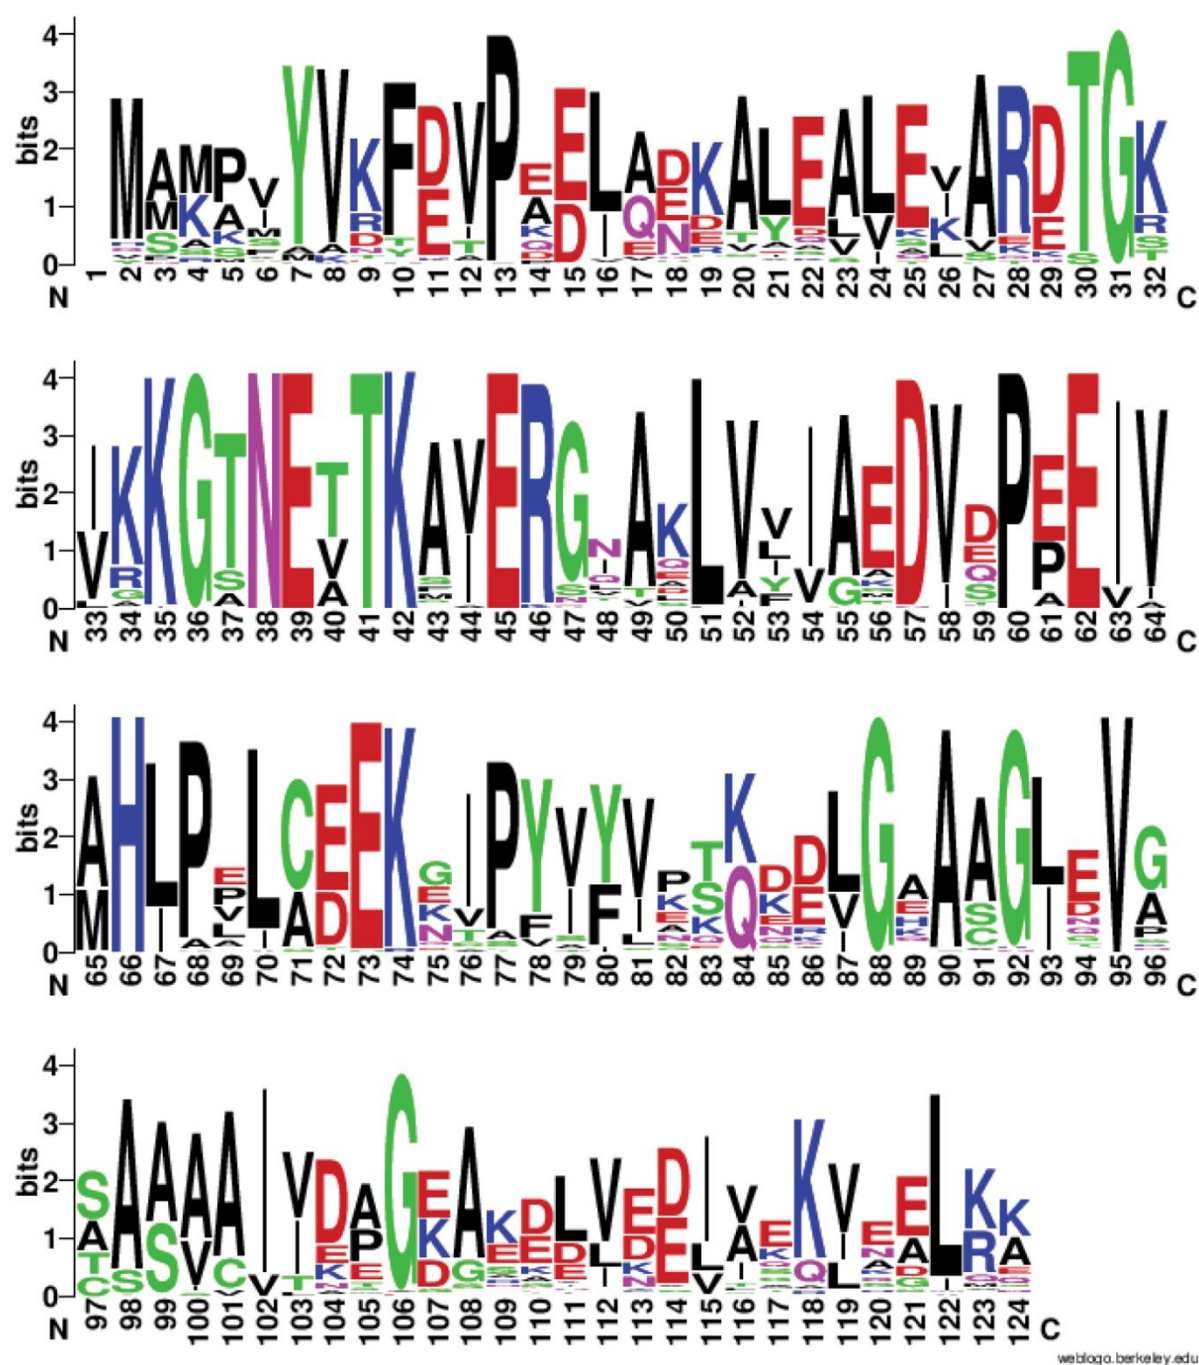

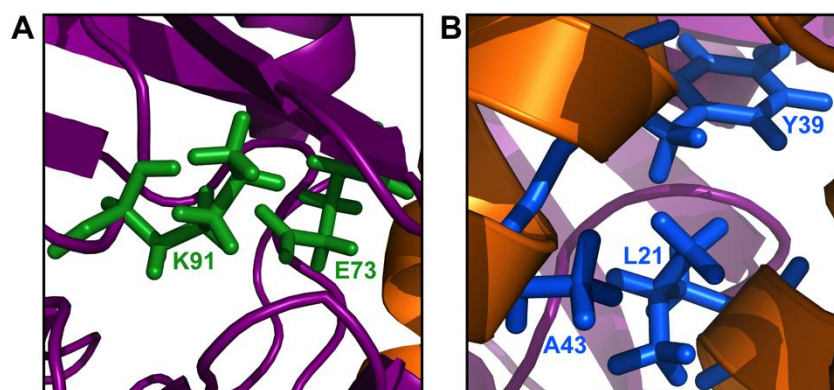

**Figure S2.** (A) Intramolecular salt bridge in the interior of *Pfu* RPP29 that helps form a hydrogen bond network connecting strand S2 and helix H4 [3]. (B) Highly conserved residues that form part of the hydrophobic core which anchors the two main helices of *Pfu* RPP21 [4].

## References

1. Edgar, R.C. MUSCLE: Multiple sequence alignment with high accuracy and high throughput. *Nucleic Acids Res.* **2004**, *32*, 1792–1797.
2. Crooks, G.E.; Hon, G.; Chandonia, J.M.; Brenner, S.E. WebLogo: A sequence logo generator. *Genome Res.* **2004**, *14*, 1188–1190.
3. Numata, T.; Ishimatsu, I.; Kakuta, Y.; Tanaka, I.; Kimura, M. Crystal structure of archaeal ribonuclease P protein Ph1771p from *Pyrococcus horikoshii* OT3: an archaeal homolog of eukaryotic ribonuclease P protein Rpp29. *RNA* **2004**, *10*, 1423–1432.
4. Amero, C.D.; Boomershine, W.P.; Xu, Y.; Foster, M. Solution structure of *Pyrococcus furiosus* RPP21, a component of the archaeal RNase P holoenzyme, and interactions with its RPP29 protein partner. *Biochemistry* **2008**, *47*, 11704–11710.

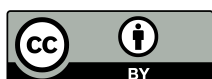

© 2016 by the authors; licensee MDPI, Basel, Switzerland. This article is an open access article distributed under the terms and conditions of the Creative Commons by Attribution (CC-BY) license (<http://creativecommons.org/licenses/by/4.0/>).
